# Supplementary material for: Validity and Reproducibility of a Self-Administered Food Frequency Questionnaire for the Assessment of Sugar Intake in Middle-Aged Japanese Adults
Source: PubMed Central journal article supplement (PMC6470835; doi:10.3390/nu11030554), 2019-03-05
Supplement: nutrients-11-00554-s001.pdf [file nutrients-11-00554-s001.pdf]

**Table S1.** Substituted food items in the FFQ

| <b>Methods</b>                                                                                                             | <b>Number of food items</b> | <b>Foods</b>                                                                                                                                                                                                                                                                                                                                                    |
|----------------------------------------------------------------------------------------------------------------------------|-----------------------------|-----------------------------------------------------------------------------------------------------------------------------------------------------------------------------------------------------------------------------------------------------------------------------------------------------------------------------------------------------------------|
| Using different parts of the same species, similar species, or same species with different cooking or purification methods | 18                          | Vitamin-enriched rice, akamiso (a type of miso), pickled radish, pickled green vegetable, pickled plum, pickled Chinese cabbage, pickled cucumber, pickled eggplants, leaf mustard, Swiss chard, sponge gourd, mugwort, hassaku orange(a type of citrus fruits), citrus iyo (a type of citrus fruits), dried wakame (seaweed), margarine, mayonnaise, and sauce |
| Prepared by dietitians using the recipes                                                                                   | 6                           | Grilled eel, chikuwa, kamaboko, salad dressing, canned coffee, powder corn soup                                                                                                                                                                                                                                                                                 |

FFQ, frequency food questionnaire

**Table S2.** Major foods contributing to sugar intake according to the DR (Cohorts I and II)

| Men (n=276)  |                       |                                            |                | Women (n=289)          |                                              |                |
|--------------|-----------------------|--------------------------------------------|----------------|------------------------|----------------------------------------------|----------------|
| Sugars       | Food groups           | Major contributing foods                   | Proportion (%) | Food groups            | Major contributing foods                     | Proportion (%) |
| Total sugars |                       |                                            |                |                        |                                              |                |
|              | Fruits                |                                            | 21.3           | Fruits                 |                                              | 24.4           |
|              |                       | Apples                                     | (5.0)          |                        | Apples                                       | (5.5)          |
|              |                       | Citrus                                     | (3.9)          |                        | Citrus                                       | (5.0)          |
|              |                       | Bananas                                    | (3.0)          |                        | Japanese persimmons                          | (3.5)          |
|              |                       | Japanese persimmons                        | (2.8)          |                        | Bananas                                      | (2.8)          |
|              |                       | Watermelon                                 | (1.2)          |                        | Watermelon                                   | (1.4)          |
|              |                       | Grapes                                     | (0.9)          |                        | Grapes                                       | (1.0)          |
|              |                       | Muskmelons                                 | (0.9)          |                        | Muskmelons                                   | (0.9)          |
|              |                       | Pears                                      | (0.7)          |                        | Pears                                        | (0.7)          |
|              |                       | Jam                                        | (0.6)          |                        | Jam                                          | (0.7)          |
|              |                       | Peaches                                    | (0.5)          |                        | Peaches                                      | (0.7)          |
|              | Vegetables            |                                            | 14.3           | Confectionaries        |                                              | 19.3           |
|              |                       | Onions                                     | (2.1)          |                        | Traditional fresh and semi-dry confectionery | (10.8)         |
|              |                       | Carrots                                    | (1.8)          |                        | Cake and pastry                              | (2.7)          |
|              |                       | Japanese radishes                          | (1.8)          |                        | Traditional dry confectionery                | (1.6)          |
|              |                       | Pumpkin and squash                         | (1.5)          |                        | Bun with filling                             | (1.5)          |
|              |                       | Tomatoes                                   | (1.4)          |                        | Pudding and chilled dessert                  | (1.0)          |
|              |                       | Cabbage                                    | (1.2)          |                        | Chocolate                                    | (0.8)          |
|              |                       | Cucumber                                   | (0.7)          |                        | Biscuits                                     | (0.7)          |
|              |                       | Eggplant                                   | (0.7)          |                        |                                              |                |
|              |                       | Welsh onions                               | (0.5)          | Milk and milk products |                                              | 13.1           |
|              |                       | Chinese cabbage                            | (0.5)          |                        | Liquid milk                                  | (8.6)          |
|              |                       | Sweet corn                                 | (0.5)          |                        | Yogurt                                       | (2.4)          |
|              |                       |                                            |                |                        | Ice cream                                    | (1.5)          |
|              | Sugars and sweeteners |                                            | 14.2           | Sugars and sweeteners  |                                              | 12.4           |
|              |                       | Sugars                                     | (13.6)         |                        | Sugars                                       | (11.8)         |
|              |                       | Honey and syrup                            | (0.6)          |                        | Honey and syrup                              | (0.5)          |
|              | Confectionaries       |                                            | 13.4           | Vegetables             |                                              | 12.3           |
|              |                       | Traditional fresh & semi-dry confectionery | (8.1)          |                        | Onions                                       | (1.7)          |
|              |                       | Cake & pastry                              | (1.5)          |                        |                                              |                |

|                               |       |
|-------------------------------|-------|
| Bun with filling              | (1.3) |
| Traditional dry confectionery | (1.1) |
| Chocolate                     | (0.5) |
| Milk and milk products        | 11.1  |
| Liquid milk                   | (8.0) |
| Yogurt                        | (1.7) |
| Ice cream                     | (1.0) |
| Non-alcoholic beverages       | 8.3   |
| Carbonated beverage           | (3.6) |
| Coffee                        | (2.1) |
| Lactic acid bacteria beverage | (1.0) |
| Fruit drinks                  | (1.0) |
| 100 percent fruit juice       | (0.6) |
| Seasonings                    | 4.8   |
| Miso                          | (2.8) |
| Japanese Worcester sauce      | (0.6) |
| Soy sauce                     | (0.5) |
| Alcohol                       | 4.5   |
| Fermented alcoholic beverage  | (2.5) |
| Compound alcoholic beverage   | (2.0) |
| Cereals                       | 3.3   |
| Bread                         | (1.9) |
| Rice                          | (0.8) |
| Noodles                       | (0.6) |

|                               |       |
|-------------------------------|-------|
| Pumpkin and squash            | (1.5) |
| Carrots                       | (1.5) |
| Japanese radishes             | (1.4) |
| Tomatoes                      | (1.4) |
| Cabbage                       | (0.9) |
| Cucumber                      | (0.6) |
| Sweet corn                    | (0.5) |
| Eggplant                      | (0.5) |
| Non-alcoholic beverages       | 5.9   |
| Carbonated beverage           | (1.8) |
| Lactic acid bacteria beverage | (1.4) |
| Fruit drinks                  | (1.0) |
| Coffee                        | (0.9) |
| 100 percent fruit juice       | (0.8) |
| Seasonings                    | 3.7   |
| Miso                          | (2.1) |

---

Glucose

---

|                    |       |
|--------------------|-------|
| Vegetables         | 26.9  |
| Japanese radishes  | (4.2) |
| Onions             | (4.1) |
| Cabbage            | (3.0) |
| Tomatoes           | (2.9) |
| Carrots            | (2.4) |
| Pumpkin and squash | (1.5) |
| Cucumber           | (1.5) |

|                     |       |
|---------------------|-------|
| Fruits              | 30.1  |
| Japanese persimmons | (7.3) |
| Citrus              | (5.9) |
| Apples              | (3.5) |
| Grapes              | (2.8) |
| Bananas             | (2.6) |
| Watermelon          | (2.0) |
| Pears               | (0.7) |

|                         |                               |        |
|-------------------------|-------------------------------|--------|
|                         | Eggplant                      | (1.5)  |
|                         | Chinese cabbage               | (1.3)  |
|                         | Welsh onions                  | (1.0)  |
|                         | Sweet corn                    | (0.5)  |
| Fruits                  |                               | 20.8   |
|                         | Japanese persimmons           | (4.6)  |
|                         | Citrus                        | (3.6)  |
|                         | Apples                        | (2.6)  |
|                         | Bananas                       | (2.3)  |
|                         | Grapes                        | (2.0)  |
|                         | Watermelon                    | (1.4)  |
|                         | Pears                         | (0.6)  |
|                         | Muskmelons                    | (0.5)  |
|                         | Pineapple                     | (0.5)  |
| Alcohol                 |                               | 19.4   |
|                         | Fermented alcoholic beverage  | (11.1) |
|                         | Compound alcoholic beverage   | (8.3)  |
| Seasonings              |                               | 15.1   |
|                         | Miso                          | (11.1) |
|                         | Soy sauce                     | (1.6)  |
|                         | Japanese Worcester sauce      | (1.4)  |
|                         | Tomato products               | (0.8)  |
| Non-alcoholic beverages |                               | 8.7    |
|                         | Carbonated beverage           | (5.3)  |
|                         | Fruit drinks                  | (1.3)  |
|                         | Lactic acid bacteria beverage | (1.2)  |
|                         | 100 percent fruit juice       | (0.9)  |
| Cereals                 |                               | 3.9    |
|                         | Bread                         | (2.3)  |
|                         | Rice                          | (1.5)  |

|                         |                               |        |
|-------------------------|-------------------------------|--------|
|                         | Muskmelons                    | (0.7)  |
|                         | Strawberries                  | (0.6)  |
|                         | Pineapple                     | (0.6)  |
| Vegetables              |                               | 28.0   |
|                         | Onions                        | (4.1)  |
|                         | Japanese radishes             | (4.1)  |
|                         | Tomatoes                      | (3.6)  |
|                         | Cabbage                       | (2.9)  |
|                         | Carrots                       | (2.4)  |
|                         | Pumpkin and squash            | (2.0)  |
|                         | Cucumber                      | (1.6)  |
|                         | Eggplant                      | (1.4)  |
|                         | Chinese cabbage               | (1.2)  |
|                         | Welsh onions                  | (1.0)  |
|                         | Sweet corn                    | (0.7)  |
| Seasonings              |                               | 14.3   |
|                         | Miso                          | (10.5) |
|                         | Soy sauce                     | (1.5)  |
|                         | Japanese Worcester sauce      | (1.2)  |
|                         | Tomato products               | (0.8)  |
| Non-alcoholic beverages |                               | 8.4    |
|                         | Carbonated beverage           | (3.3)  |
|                         | Lactic acid bacteria beverage | (1.9)  |
|                         | Fruit drinks                  | (1.7)  |
|                         | 100 percent fruit juice       | (1.3)  |
| Alcohol                 |                               | 8.4    |
|                         | Compound alcoholic beverage   | (7.8)  |
|                         | Fermented alcoholic beverage  | (0.5)  |
| Cereals                 |                               | 4.1    |
|                         | Bread                         | (2.9)  |
|                         | Rice                          | (1.1)  |

---

Fructose

Fruits 41.4

Fruits 48.2

|                               |        |
|-------------------------------|--------|
| Apples                        | (14.5) |
| Japanese persimmons           | (5.7)  |
| Citrus                        | (5.3)  |
| Watermelon                    | (3.9)  |
| Bananas                       | (2.8)  |
| Grapes                        | (2.6)  |
| Pears                         | (2.0)  |
| Muskmelons                    | (0.7)  |
| Strawberries                  | (0.6)  |
| Pineapple                     | (0.6)  |
| Vegetables                    | 32.8   |
| Onions                        | (5.2)  |
| Tomatoes                      | (4.3)  |
| Japanese radishes             | (4.3)  |
| Cabbage                       | (3.0)  |
| Carrots                       | (3.0)  |
| Cucumber                      | (2.2)  |
| Pumpkin and squash            | (1.8)  |
| Eggplant                      | (1.8)  |
| Chinese cabbage               | (1.3)  |
| Welsh onions                  | (1.3)  |
| Sweet corn                    | (0.6)  |
| Non-alcoholic beverages       | 13.1   |
| Carbonated beverage           | (7.6)  |
| Fruit drinks                  | (2.2)  |
| 100 percent fruit juice       | (1.8)  |
| Lactic acid bacteria beverage | (1.6)  |
| Cereals                       | 4.5    |
| Bread                         | (4.4)  |
| Seasonings                    | 3.6    |
| Japanese Worcester sauce      | (1.5)  |
| Miso                          | (1.1)  |
| Tomato products               | (0.9)  |

|                               |        |
|-------------------------------|--------|
| Apples                        | (16.3) |
| Japanese persimmons           | (7.2)  |
| Citrus                        | (7.1)  |
| Watermelon                    | (4.6)  |
| Grapes                        | (2.9)  |
| Bananas                       | (2.6)  |
| Pears                         | (2.1)  |
| Strawberries                  | (0.8)  |
| Muskmelons                    | (0.8)  |
| Pineapple                     | (0.6)  |
| Vegetables                    | 28.3   |
| Tomatoes                      | (4.4)  |
| Onions                        | (4.2)  |
| Japanese radishes             | (3.4)  |
| Carrots                       | (2.5)  |
| Cabbage                       | (2.4)  |
| Pumpkin and squash            | (2.0)  |
| Cucumber                      | (1.9)  |
| Eggplant                      | (1.4)  |
| Chinese cabbage               | (1.0)  |
| Welsh onions                  | (1.0)  |
| Sweet corn                    | (0.7)  |
| Non-alcoholic beverages       | 11.1   |
| Carbonated beverage           | (4.2)  |
| Fruit drinks                  | (2.5)  |
| 100 percent fruit juice       | (2.3)  |
| Lactic acid bacteria beverage | (2.1)  |
| Cereals                       | 4.6    |
| Bread                         | (4.5)  |

|                                              |        |                                              |        |
|----------------------------------------------|--------|----------------------------------------------|--------|
| Seasonings                                   | 55.6   | Milk and milk products                       | 57.2   |
| Soy sauce                                    | (34.9) | Yogurt                                       | (54.7) |
| Miso                                         | (20.2) | Ice cream                                    | (1.7)  |
|                                              |        | Cheeses                                      | (0.5)  |
| Milk and milk products                       | 43.8   | Seasonings                                   | 42.1   |
| Yogurt                                       | (41.7) | Soy sauce                                    | (26.5) |
| Ice cream                                    | (1.2)  | Miso                                         | (15.3) |
| Cheeses                                      | (0.8)  |                                              |        |
| <hr/>                                        |        |                                              |        |
| Sucrose                                      |        |                                              |        |
| Sugars and sweeteners                        | 27.8   | Confectionaries                              | 34.7   |
| Sugars                                       | (27.8) | Traditional fresh and semi-dry confectionery | (20.0) |
| Confectionaries                              | 25.9   | Cake and pastry                              | (4.9)  |
| Traditional fresh and semi-dry confectionery | (15.9) | Traditional dry confectionery                | (2.9)  |
| Cake and pastry                              | (2.9)  | Bun with filling                             | (2.6)  |
| Bun with filling                             | (2.4)  | Pudding and chilled dessert                  | (1.5)  |
| Traditional dry confectionery                | (2.2)  | Biscuits                                     | (1.3)  |
| Chocolate                                    | (0.9)  | Chocolate                                    | (1.2)  |
| Biscuits                                     | (0.8)  | Sugars and sweeteners                        | 22.6   |
| Pudding and chilled dessert                  | (0.6)  | Sugars                                       | (22.6) |
| Fruits                                       | 20.1   | Fruits                                       | 21.3   |
| Citrus                                       | (4.5)  | Citrus                                       | (5.4)  |
| Bananas                                      | (4.2)  | Apples                                       | (4.2)  |
| Apples                                       | (4.0)  | Bananas                                      | (3.6)  |
| Japanese persimmons                          | (1.6)  | Japanese persimmons                          | (2.0)  |
| Muskmelons                                   | (1.3)  | Muskmelons                                   | (1.3)  |
| Jam                                          | (1.0)  | Jam                                          | (1.1)  |
| Peaches                                      | (0.8)  | Peaches                                      | (1.0)  |
| Watermelon                                   | (0.5)  | Watermelon                                   | (0.5)  |
| Pears                                        | (0.5)  | Pears                                        | (0.5)  |
| Pineapple                                    | (0.5)  | Pineapple                                    | (0.5)  |
| Non-alcoholic beverages                      | 7.9    | Vegetables                                   | 4.9    |
| Coffee                                       | (3.9)  | Pumpkin and squash                           | (1.7)  |
| Carbonated beverage                          | (2.3)  | Carrots                                      | (1.2)  |
| Lactic acid bacteria beverage                | (0.8)  | Sweet corn                                   | (0.5)  |
| Fruit drinks                                 | (0.6)  | Onions                                       | (0.5)  |

|                        |       |
|------------------------|-------|
| Vegetables             | 5.9   |
| Pumpkin and squash     | (1.7) |
| Carrots                | (1.6) |
| Onions                 | (0.6) |
| Sweet corn             | (0.6) |
| Milk and milk products | 3.0   |
| Yogurt                 | (1.4) |
| Ice cream              | (1.3) |

|                               |       |
|-------------------------------|-------|
| Non-alcoholic beverages       | 4.5   |
| Coffee                        | (1.6) |
| Carbonated beverage           | (1.0) |
| Lactic acid bacteria beverage | (1.0) |
| Fruit drinks                  | (0.5) |
| Milk and milk products        | 4.1   |
| Yogurt                        | (2.1) |
| Ice cream                     | (1.8) |

---

Maltose

---

|                                              |        |
|----------------------------------------------|--------|
| Cereals                                      | 41.4   |
| Noodles                                      | (20.8) |
| Bread                                        | (20.0) |
| Wheat flour                                  | (0.5)  |
| Potatoes                                     | 21.5   |
| Sweet potato                                 | (21.5) |
| Confectionaries                              | 16.8   |
| Traditional fresh and semi-dry confectionery | (11.1) |
| Traditional dry confectionery                | (2.2)  |
| Candy                                        | (1.6)  |
| Bun with filling                             | (1.4)  |
| Alcohol                                      | 8.8    |
| Compound alcoholic beverage                  | (8.8)  |
| Milk and milk products                       | 4.2    |
| Ice cream                                    | (3.6)  |
| Sherbet                                      | (0.6)  |

|                                              |        |
|----------------------------------------------|--------|
| Cereals                                      | 32.5   |
| Bread                                        | (18.6) |
| Noodles                                      | (13.5) |
| Potatoes                                     | 27.0   |
| Starch sweeteners                            | (0.6)  |
| Confectionaries                              | 22.3   |
| Traditional fresh and semi-dry confectionery | (14.1) |
| Candy                                        | (3.3)  |
| Traditional dry confectionery                | (3.2)  |
| Bun with filling                             | (1.4)  |
| Alcohol                                      | 6.3    |
| Compound alcoholic beverage                  | (6.3)  |
| Milk and milk products                       | 5.4    |
| Ice cream                                    | (4.8)  |
| Sherbet                                      | (0.5)  |

---

Lactose

---

|                        |        |
|------------------------|--------|
| Milk and milk products | 93.0   |
| Liquid milk            | (80.0) |
| Yogurt                 | (7.5)  |
| Ice cream              | (2.4)  |
| Milk powder            | (2.1)  |

|                        |        |
|------------------------|--------|
| Milk and milk products | 93.0   |
| Liquid milk            | (76.9) |
| Yogurt                 | (9.0)  |
| Ice cream              | (3.1)  |
| Milk powder            | (3.1)  |

|                               |       |                             |       |
|-------------------------------|-------|-----------------------------|-------|
| Coffee whitener, cream        | (0.6) | Coffee whitener, cream      | (0.5) |
| Non-alcoholic beverages       | 3.2   | Confectionaries             | 3.7   |
| Coffee                        | (2.0) | Chocolate                   | (1.4) |
| Lactic acid bacteria beverage | (1.2) | Bun with filling            | (0.8) |
|                               |       | Cake and pastry             | (0.8) |
|                               |       | Pudding and chilled dessert | (0.5) |

---

Starch

---

|                                              |        |                                              |        |
|----------------------------------------------|--------|----------------------------------------------|--------|
| Cereals                                      | 90.7   | Cereals                                      | 85.0   |
| Rice                                         | (75.5) | Rice                                         | (67.6) |
| Noodles                                      | (9.0)  | Noodles                                      | (8.9)  |
| Bread                                        | (3.7)  | Bread                                        | (5.7)  |
| Wheat                                        | (2.0)  | Wheat                                        | (2.4)  |
| Confectionaries                              | 3.6    | Confectionaries                              | 7.0    |
| Traditional fresh and semi-dry confectionery | (1.3)  | Traditional fresh and semi-dry confectionery | (2.6)  |
| Traditional dry confectionery                | (0.9)  | Traditional dry confectionery                | (1.5)  |
| Bun with filling                             | (0.6)  | Cake and pastry                              | (1.2)  |
| Cake and pastry                              | (0.5)  | Bun with filling                             | (1.0)  |
|                                              |        | Biscuits                                     | (0.6)  |
|                                              |        | Potatoes                                     | 3.7    |
|                                              |        | Potato                                       | (1.9)  |
|                                              |        | Sweet potato                                 | (1.2)  |

---

DR, dietary record

Foods that contributed to at least 0.5% have been listed.



**Table S3-1.** Comparison of FFQ for sugar intakes with urinary sugars based on cross classification by quintile (%)

|                             | <b>Cohort I</b>                      |                                              |                                     |
|-----------------------------|--------------------------------------|----------------------------------------------|-------------------------------------|
|                             | <b>n=72 (Men: n=27, Women: n=45)</b> |                                              |                                     |
|                             | <b>Same category<sup>1</sup></b>     | <b>Same or Adjacent category<sup>2</sup></b> | <b>Extreme category<sup>3</sup></b> |
| Total sugars <sup>4,5</sup> | 22 (n=16)                            | 63 (n=45)                                    | 6 (n=4)                             |

<sup>1</sup>Percentage of participants whose sugar intakes from FFQ and urinary sugars were classified into the same category by quintile.

<sup>2</sup>Percentage of participants whose sugar intakes from FFQ and urinary sugars were classified into the same or adjacent category by quintile.

<sup>3</sup>Percentage of participants whose sugar intakes from FFQ and urinary sugars were classified into the extreme (lowest or highest) category by quintile.

<sup>4</sup>"Total sugars" was the sum of the crude consumption of the following saccharides: glucose, fructose, galactose, sucrose, maltose, and lactose.

<sup>5</sup>Sugar intakes were adjusted using the density method and urinary sugars were adjusted by urinary creatinine concentration.

FFQ, food frequency questionnaire.

**Table S3-2.** Frequency and means of FFQ for sugar intakes with urinary sugars based on cross classification by quintile (Cohort I, n=72)

|                                                                 |             | <b>Sugar intakes from FFQv (% energy)<sup>1</sup></b> |            |            |            |            |
|-----------------------------------------------------------------|-------------|-------------------------------------------------------|------------|------------|------------|------------|
| Means (SD)                                                      |             | 6.7 (2.2)                                             | 10.7 (1.0) | 13.3 (0.6) | 16.2 (0.6) | 19.0 (2.0) |
| <b>Urinary sugar<br/>(creatinine-<br/>adjusted)<sup>1</sup></b> | 0.17 (0.04) | 3                                                     | 4          | 1          | 3          | 3          |
|                                                                 | 0.32 (0.05) | 4                                                     | 4          | 2          | 3          | 2          |
|                                                                 | 0.57 (0.08) | 5                                                     | 4          | 2          | 2          | 1          |
|                                                                 | 0.85 (0.08) | 1                                                     | 2          | 5          | 3          | 4          |
|                                                                 | 1.26 (0.38) | 1                                                     | 1          | 4          | 4          | 4          |

FFQv, food frequency questionnaire for validity; SD, standard deviation

Dark grey cells represent the number of participants whose sugar intakes from FFQv and urinary sugars were classified into the same category by quintile.; Light grey cells represent the number of participants whose sugar intakes from FFQv and urinary sugars were classified into the adjacent category by quintile.; Shaded cells represent the number of participants whose sugar intakes from FFQv and urinary sugars were classified into the extreme (lowest or highest) category by quintile.

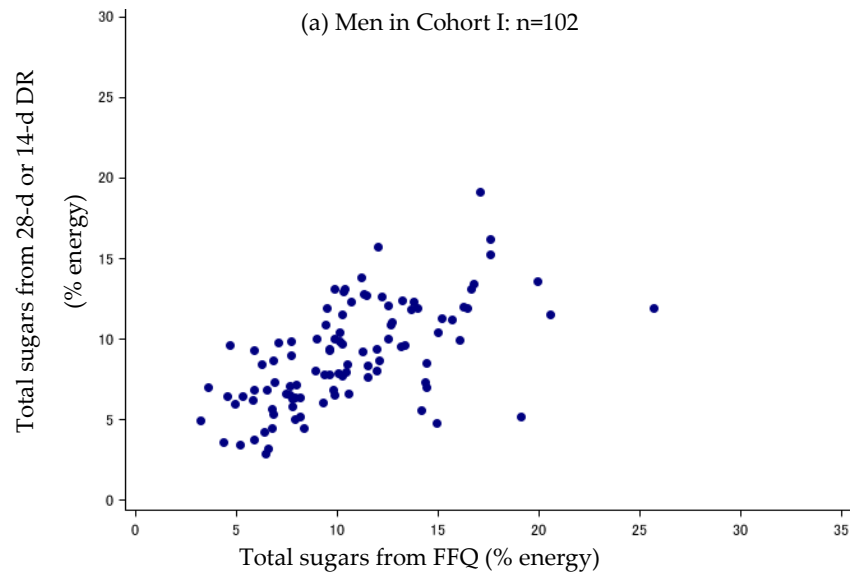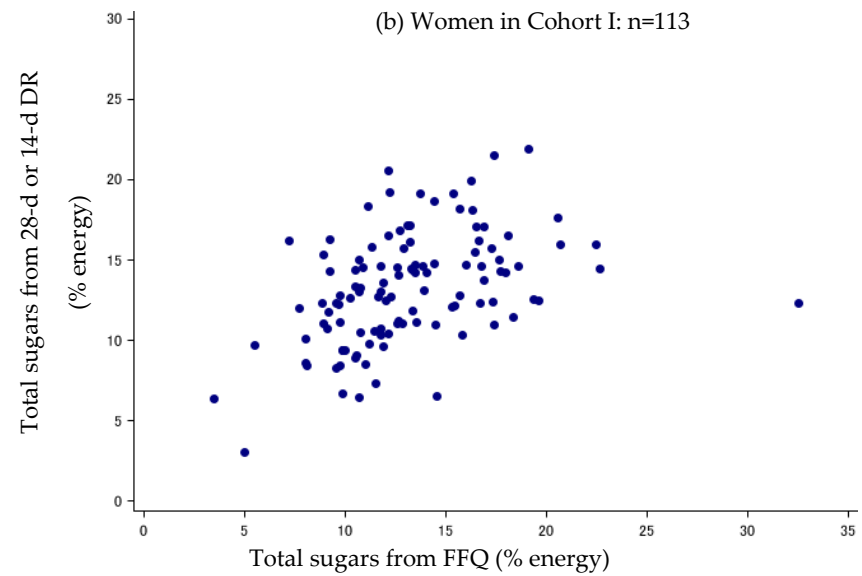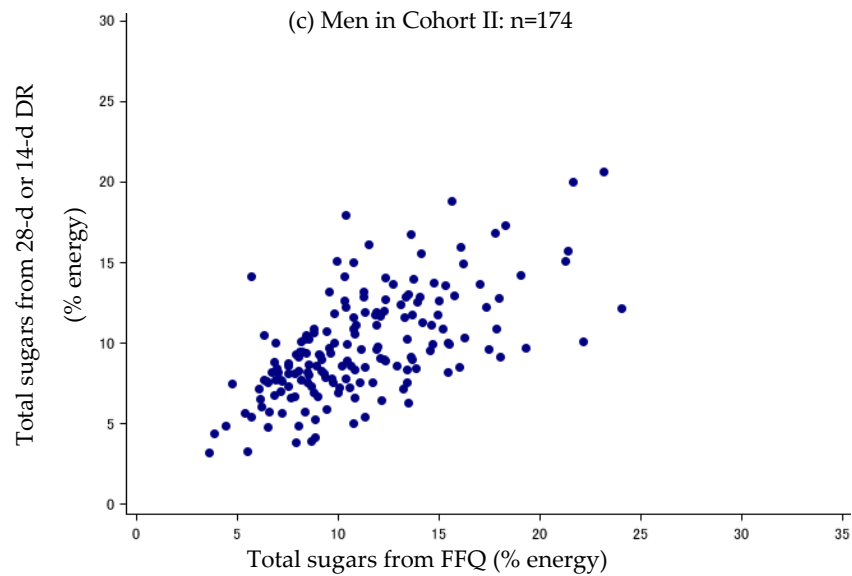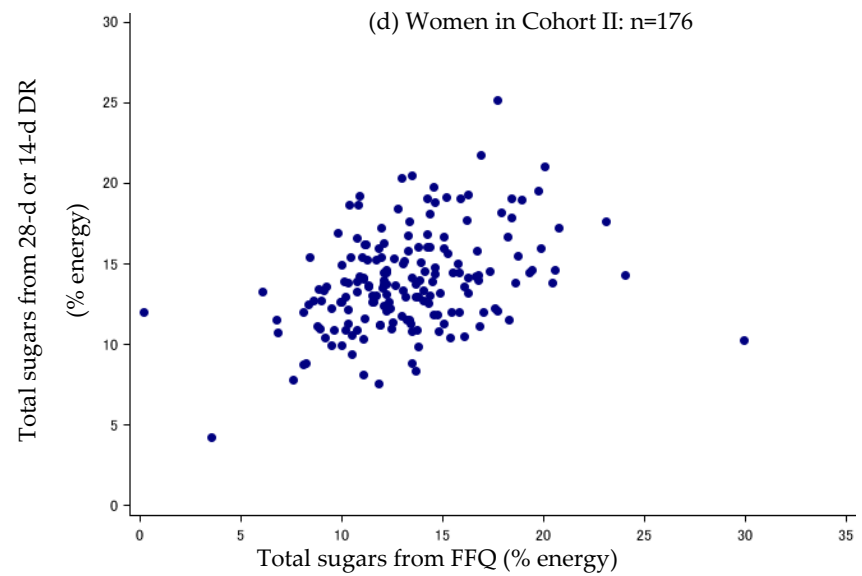

**Figure S1.** Scatter plots between total sugars from FFQ and DR

The regression coefficients:  $\beta=0.58$  ( $p<0.001$ ), men in Cohort I;  $\beta=0.49$  ( $p<0.001$ ), women in Cohort I;  $\beta=0.61$  ( $p<0.001$ ), men in Cohort II;  $\beta=0.26$  ( $p<0.001$ ), women in Cohort II. The percent energy of total sugar intake from the FFQ and DR were log-transformed for the regression analysis.

**Table S4.** Correlations between FFQv and DR for 28- or 14-days

|                           | Spearman's rank Correlation Coefficient |              |                                            |              |                                           |              | ICC<br>for DR |
|---------------------------|-----------------------------------------|--------------|--------------------------------------------|--------------|-------------------------------------------|--------------|---------------|
|                           | Crude                                   |              | Energy-adjusted<br>(residual) <sup>1</sup> |              | Energy-adjusted<br>(density) <sup>2</sup> |              |               |
|                           | r                                       | 95% CI       | r                                          | 95% CI       | r                                         | 95% CI       |               |
| Cohort I                  |                                         |              |                                            |              |                                           |              |               |
| Men (n=102)               |                                         |              |                                            |              |                                           |              |               |
| Total sugars <sup>3</sup> | 0.64                                    | (0.51, 0.74) | 0.57                                       | (0.43, 0.69) | 0.64                                      | (0.50, 0.74) | 0.43          |
| Glucose                   | 0.67                                    | (0.54, 0.76) | 0.57                                       | (0.43, 0.69) | 0.63                                      | (0.49, 0.73) | 0.27          |
| Fructose                  | 0.59                                    | (0.44, 0.70) | 0.56                                       | (0.42, 0.68) | 0.58                                      | (0.43, 0.69) | 0.27          |
| Galactose                 | 0.55                                    | (0.40, 0.67) | 0.53                                       | (0.38, 0.66) | 0.56                                      | (0.41, 0.68) | 0.44          |
| Sucrose                   | 0.61                                    | (0.48, 0.72) | 0.55                                       | (0.40, 0.67) | 0.61                                      | (0.47, 0.72) | 0.41          |
| Maltose                   | 0.47                                    | (0.31, 0.61) | 0.45                                       | (0.28, 0.60) | 0.46                                      | (0.29, 0.60) | 0.13          |
| Lactose                   | 0.66                                    | (0.54, 0.76) | 0.60                                       | (0.45, 0.71) | 0.61                                      | (0.47, 0.72) | 0.43          |
| Starch                    | 0.74                                    | (0.64, 0.82) | 0.52                                       | (0.36, 0.65) | 0.47                                      | (0.30, 0.61) | 0.37          |
| Energy                    | 0.53                                    | (0.37, 0.65) |                                            |              |                                           |              |               |
| Protein                   | 0.46                                    | (0.29, 0.60) | 0.29                                       | (0.10, 0.46) | 0.22                                      | (0.02, 0.39) | 0.21          |
| Fat                       | 0.32                                    | (0.14, 0.49) | 0.53                                       | (0.37, 0.66) | 0.49                                      | (0.32, 0.62) | 0.25          |
| Carbohydrate              | 0.71                                    | (0.59, 0.79) | 0.60                                       | (0.46, 0.71) | 0.62                                      | (0.48, 0.72) | 0.42          |
| Women (n=113)             |                                         |              |                                            |              |                                           |              |               |
| Total sugars <sup>3</sup> | 0.52                                    | (0.37, 0.64) | 0.31                                       | (0.13, 0.46) | 0.48                                      | (0.32, 0.61) | 0.36          |
| Glucose                   | 0.48                                    | (0.32, 0.61) | 0.32                                       | (0.15, 0.48) | 0.42                                      | (0.25, 0.56) | 0.18          |
| Fructose                  | 0.51                                    | (0.36, 0.63) | 0.36                                       | (0.18, 0.51) | 0.46                                      | (0.30, 0.59) | 0.22          |
| Galactose                 | 0.67                                    | (0.55, 0.76) | 0.60                                       | (0.47, 0.71) | 0.64                                      | (0.52, 0.74) | 0.23          |
| Sucrose                   | 0.48                                    | (0.32, 0.61) | 0.33                                       | (0.16, 0.49) | 0.43                                      | (0.27, 0.57) | 0.32          |
| Maltose                   | 0.42                                    | (0.26, 0.56) | 0.43                                       | (0.26, 0.57) | 0.41                                      | (0.24, 0.55) | 0.13          |
| Lactose                   | 0.69                                    | (0.58, 0.78) | 0.66                                       | (0.54, 0.75) | 0.65                                      | (0.52, 0.74) | 0.34          |
| Starch                    | 0.58                                    | (0.44, 0.69) | 0.45                                       | (0.29, 0.59) | 0.34                                      | (0.17, 0.49) | 0.29          |
| Energy                    | 0.41                                    | (0.25, 0.56) |                                            |              |                                           |              |               |

|                           |      |              |      |              |      |              |      |
|---------------------------|------|--------------|------|--------------|------|--------------|------|
| Protein                   | 0.38 | (0.21, 0.53) | 0.25 | (0.07, 0.42) | 0.21 | (0.03, 0.38) | 0.17 |
| Fat                       | 0.20 | (0.02, 0.37) | 0.46 | (0.30, 0.59) | 0.45 | (0.29, 0.59) | 0.22 |
| Carbohydrate              | 0.58 | (0.45, 0.69) | 0.43 | (0.27, 0.57) | 0.41 | (0.24, 0.55) | 0.29 |
| <hr/>                     |      |              |      |              |      |              |      |
| Cohort II                 |      |              |      |              |      |              |      |
| <hr/>                     |      |              |      |              |      |              |      |
| Men (n=174)               |      |              |      |              |      |              |      |
| <hr/>                     |      |              |      |              |      |              |      |
| Total sugars <sup>3</sup> | 0.45 | (0.32, 0.56) | 0.62 | (0.52, 0.70) | 0.62 | (0.52, 0.71) | 0.42 |
| Glucose                   | 0.40 | (0.27, 0.52) | 0.53 | (0.41, 0.63) | 0.52 | (0.40, 0.62) | 0.30 |
| Fructose                  | 0.45 | (0.32, 0.56) | 0.57 | (0.46, 0.66) | 0.57 | (0.46, 0.66) | 0.33 |
| Galactose                 | 0.59 | (0.49, 0.68) | 0.60 | (0.50, 0.69) | 0.61 | (0.51, 0.70) | 0.45 |
| Sucrose                   | 0.41 | (0.28, 0.53) | 0.54 | (0.42, 0.63) | 0.54 | (0.43, 0.64) | 0.35 |
| Maltose                   | 0.30 | (0.16, 0.43) | 0.40 | (0.27, 0.52) | 0.44 | (0.31, 0.55) | 0.20 |
| Lactose                   | 0.76 | (0.69, 0.82) | 0.75 | (0.68, 0.81) | 0.77 | (0.70, 0.82) | 0.48 |
| Starch                    | 0.54 | (0.43, 0.64) | 0.64 | (0.55, 0.72) | 0.58 | (0.47, 0.67) | 0.39 |
| <hr/>                     |      |              |      |              |      |              |      |
| Energy                    | 0.37 | (0.24, 0.49) |      |              |      |              |      |
| Protein                   | 0.29 | (0.15, 0.42) | 0.35 | (0.22, 0.48) | 0.34 | (0.20, 0.47) | 0.24 |
| Fat                       | 0.25 | (0.10, 0.38) | 0.54 | (0.43, 0.64) | 0.49 | (0.37, 0.60) | 0.30 |
| Carbohydrate              | 0.46 | (0.34, 0.57) | 0.69 | (0.60, 0.76) | 0.67 | (0.58, 0.74) | 0.42 |
| <hr/>                     |      |              |      |              |      |              |      |
| Women (n=176)             |      |              |      |              |      |              |      |
| <hr/>                     |      |              |      |              |      |              |      |
| Total sugars <sup>3</sup> | 0.25 | (0.11, 0.39) | 0.39 | (0.26, 0.51) | 0.37 | (0.23, 0.49) | 0.30 |
| Glucose                   | 0.29 | (0.14, 0.42) | 0.34 | (0.21, 0.47) | 0.36 | (0.22, 0.48) | 0.20 |
| Fructose                  | 0.28 | (0.14, 0.41) | 0.30 | (0.16, 0.43) | 0.31 | (0.17, 0.44) | 0.20 |
| Galactose                 | 0.59 | (0.48, 0.68) | 0.63 | (0.54, 0.71) | 0.64 | (0.55, 0.72) | 0.28 |
| Sucrose                   | 0.22 | (0.08, 0.36) | 0.32 | (0.18, 0.45) | 0.30 | (0.16, 0.43) | 0.24 |
| Maltose                   | 0.24 | (0.10, 0.38) | 0.24 | (0.10, 0.38) | 0.26 | (0.11, 0.39) | 0.15 |
| Lactose                   | 0.67 | (0.58, 0.74) | 0.71 | (0.62, 0.77) | 0.71 | (0.63, 0.78) | 0.40 |
| Starch                    | 0.44 | (0.31, 0.55) | 0.45 | (0.32, 0.56) | 0.37 | (0.23, 0.49) | 0.38 |
| <hr/>                     |      |              |      |              |      |              |      |
| Energy                    | 0.26 | (0.11, 0.39) |      |              |      |              |      |
| Protein                   | 0.33 | (0.20, 0.46) | 0.31 | (0.17, 0.44) | 0.26 | (0.11, 0.39) | 0.21 |
| Fat                       | 0.32 | (0.18, 0.45) | 0.48 | (0.36, 0.59) | 0.37 | (0.23, 0.49) | 0.26 |

---

|              |      |              |      |              |      |              |      |
|--------------|------|--------------|------|--------------|------|--------------|------|
| Carbohydrate | 0.31 | (0.17, 0.44) | 0.47 | (0.35, 0.58) | 0.37 | (0.24, 0.49) | 0.29 |
|--------------|------|--------------|------|--------------|------|--------------|------|

---

DR, dietary record; FFQv, food frequency questionnaire for validity; r, correlation coefficient; CI, confidence interval; ICC, intra-class correlation coefficient

<sup>1</sup> Sugar and other nutrients intakes were adjusted for energy intake by residual model.

<sup>2</sup> Sugar and other nutrients intakes were energy-adjusted using the density method (percentage of energy).

<sup>3</sup> "Total sugars" was the sum of the crude consumption of the following saccharides: glucose, fructose, galactose, sucrose, maltose, and lactose.

**Table S5.** Rank correlation coefficients between %energy of sugar intake assessed using the DR for 28 days and FFQv in Cohorts I and II using the probit transformation method with correction for measurement error

|                             | Cohort I                 |              |                    |              | Cohort II                  |              |                    |              |
|-----------------------------|--------------------------|--------------|--------------------|--------------|----------------------------|--------------|--------------------|--------------|
|                             | Men (n=75), Women (n=85) |              |                    |              | Men (n=174), Women (n=176) |              |                    |              |
|                             | Observed                 |              | Corrected          |              | Observed                   |              | Corrected          |              |
|                             | Spearman's rank CC       |              | Spearman's rank CC |              | Spearman's rank CC         |              | Spearman's rank CC |              |
|                             | r                        | (95% CI)     | r                  | (95% CI)     | r                          | (95% CI)     | r                  | (95% CI)     |
| Men                         |                          |              |                    |              |                            |              |                    |              |
| Total sugars <sup>1,2</sup> | 0.58                     | (0.40, 0.71) | 0.65               | (0.50, 0.77) | 0.60                       | (0.49, 0.69) | 0.66               | (0.56, 0.73) |
| Glucose <sup>2</sup>        | 0.59                     | (0.41, 0.72) | 0.73               | (0.61, 0.82) | 0.48                       | (0.36, 0.59) | 0.56               | (0.45, 0.65) |
| Fructose <sup>2</sup>       | 0.54                     | (0.36, 0.68) | 0.72               | (0.59, 0.81) | 0.55                       | (0.43, 0.64) | 0.61               | (0.51, 0.69) |
| Galactose <sup>2</sup>      | 0.47                     | (0.27, 0.63) | 0.77               | (0.66, 0.85) | 0.52                       | (0.40, 0.62) | 0.64               | (0.55, 0.72) |
| Sucrose <sup>2</sup>        | 0.58                     | (0.41, 0.71) | 0.65               | (0.49, 0.76) | 0.56                       | (0.44, 0.65) | 0.63               | (0.53, 0.71) |
| Maltose <sup>2</sup>        | 0.51                     | (0.32, 0.66) | 0.77               | (0.66, 0.85) | 0.55                       | (0.43, 0.64) | 0.68               | (0.59, 0.75) |
| Lactose <sup>2</sup>        | 0.69                     | (0.55, 0.80) | 0.81               | (0.71, 0.88) | 0.69                       | (0.60, 0.76) | 0.76               | (0.69, 0.82) |
| Starch                      | 0.45                     | (0.25, 0.62) | 0.51               | (0.32, 0.66) | 0.58                       | (0.47, 0.67) | 0.64               | (0.55, 0.72) |
| Women                       |                          |              |                    |              |                            |              |                    |              |
| Total sugars <sup>1,2</sup> | 0.39                     | (0.19, 0.56) | 0.46               | (0.27, 0.61) | 0.38                       | (0.24, 0.50) | 0.44               | (0.31, 0.55) |
| Glucose <sup>2</sup>        | 0.24                     | (0.03, 0.43) | 0.30               | (0.09, 0.48) | 0.40                       | (0.26, 0.51) | 0.47               | (0.35, 0.58) |
| Fructose <sup>2</sup>       | 0.27                     | (0.06, 0.45) | 0.34               | (0.14, 0.52) | 0.38                       | (0.24, 0.50) | 0.44               | (0.31, 0.55) |
| Galactose <sup>2</sup>      | 0.41                     | (0.21, 0.57) | 0.55               | (0.38, 0.68) | 0.50                       | (0.38, 0.60) | 0.63               | (0.54, 0.71) |
| Sucrose <sup>2</sup>        | 0.37                     | (0.17, 0.54) | 0.43               | (0.24, 0.59) | 0.31                       | (0.17, 0.44) | 0.37               | (0.24, 0.49) |
| Maltose <sup>2</sup>        | 0.45                     | (0.26, 0.60) | 0.59               | (0.43, 0.71) | 0.43                       | (0.30, 0.54) | 0.53               | (0.42, 0.63) |
| Lactose <sup>2</sup>        | 0.69                     | (0.56, 0.79) | 0.86               | (0.79, 0.91) | 0.66                       | (0.57, 0.74) | 0.74               | (0.67, 0.80) |
| Starch                      | 0.41                     | (0.22, 0.57) | 0.51               | (0.34, 0.66) | 0.36                       | (0.22, 0.48) | 0.41               | (0.28, 0.52) |

DR, dietary record; FFQv, food frequency questionnaire for validity; CC, correlation coefficient; CI, confidence interval

Participants living in Ishikawa area in Cohort I were excluded from the analysis because they completed 14 days of DR.

<sup>1</sup> "Total sugars" was the sum of the crude consumption of the following saccharides: glucose, fructose, galactose, sucrose, maltose, and lactose.

<sup>2</sup> Sugars intakes were adjusted by using the density method (percentage of energy).



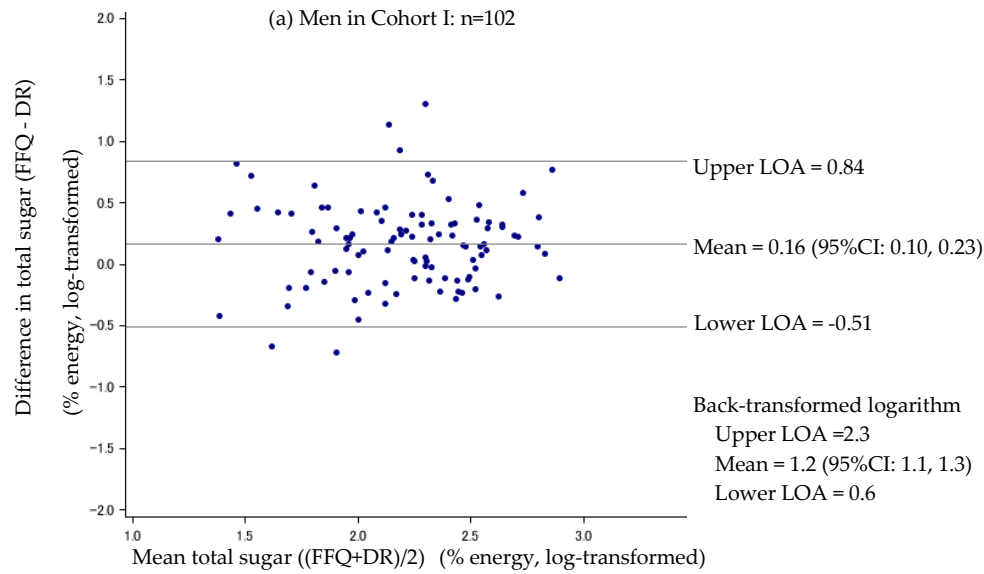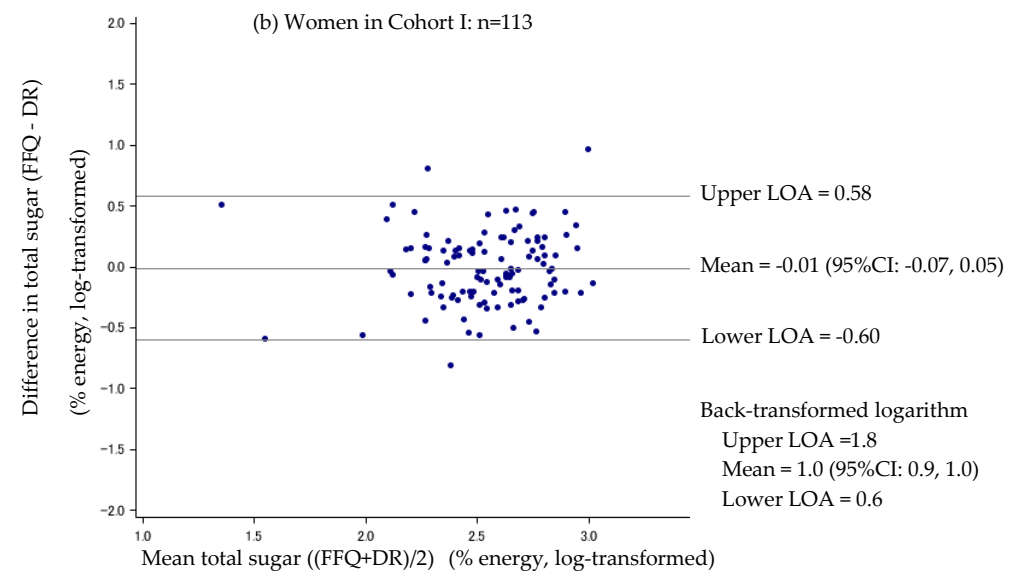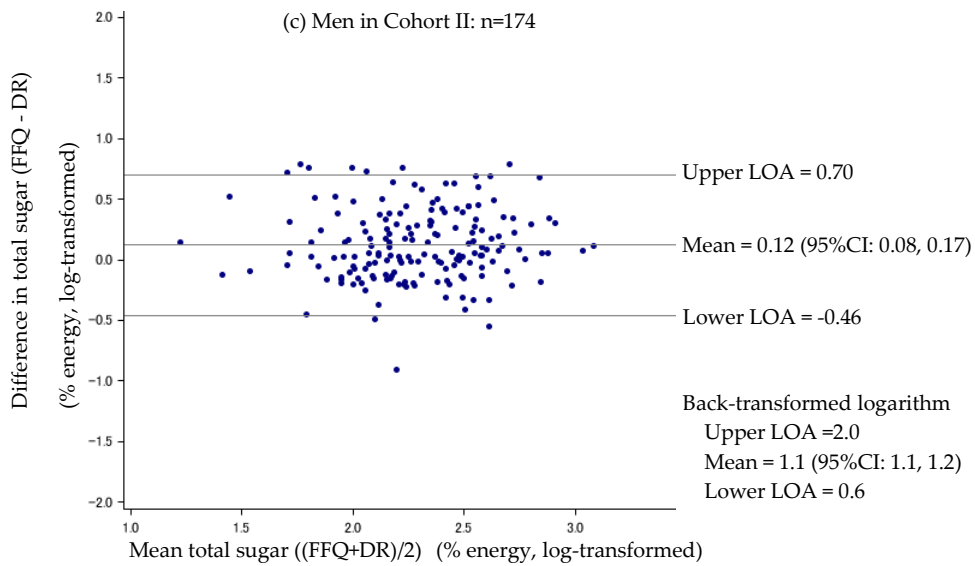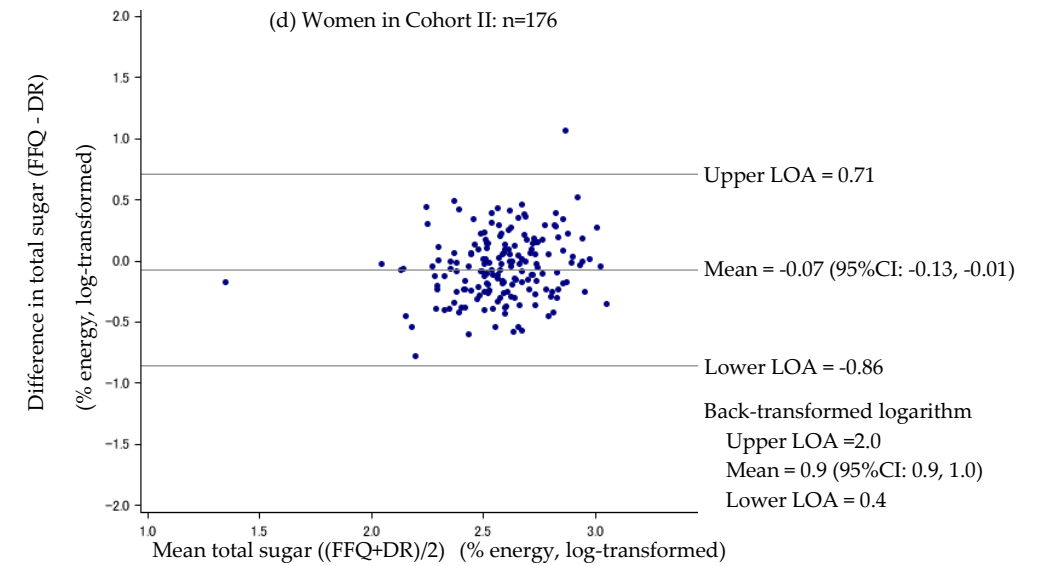

**Figure S2.** Bland-Altman plot for the comparison of the FFQ and DR in measuring the total sugar intake  
 FFQ, food frequency questionnaire; DR, dietary record; LOA, limit of agreement

**Table S6.** Comparison of FFQv with DR for sugar intakes based on cross classification by quintile (%)

|                             | Cohort I                   |                                          |                               | Cohort II                  |                                          |                               |
|-----------------------------|----------------------------|------------------------------------------|-------------------------------|----------------------------|------------------------------------------|-------------------------------|
|                             | Men (n=102), Women (n=113) |                                          |                               | Men (n=174), Women (n=176) |                                          |                               |
|                             | Same category <sup>1</sup> | Same or Adjacent categories <sup>2</sup> | Extreme category <sup>3</sup> | Same category <sup>1</sup> | Same or Adjacent categories <sup>2</sup> | Extreme category <sup>3</sup> |
| Men                         |                            |                                          |                               |                            |                                          |                               |
| Total sugars <sup>4,5</sup> | 36                         | 81                                       | 3                             | 34                         | 75                                       | 1                             |
| Glucose <sup>5</sup>        | 31                         | 75                                       | 1                             | 34                         | 71                                       | 1                             |
| Fructose <sup>5</sup>       | 30                         | 77                                       | 0                             | 36                         | 73                                       | 1                             |
| Galactose <sup>5</sup>      | 34                         | 71                                       | 1                             | 40                         | 80                                       | 1                             |
| Sucrose <sup>5</sup>        | 28                         | 78                                       | 2                             | 32                         | 75                                       | 2                             |
| Maltose <sup>5</sup>        | 32                         | 72                                       | 1                             | 32                         | 69                                       | 3                             |
| Lactose <sup>5</sup>        | 35                         | 82                                       | 1                             | 45                         | 87                                       | 1                             |
| Starch                      | 35                         | 74                                       | 3                             | 37                         | 72                                       | 1                             |
| Women                       |                            |                                          |                               |                            |                                          |                               |
| Total sugars <sup>4,5</sup> | 22                         | 69                                       | 2                             | 28                         | 66                                       | 3                             |
| Glucose <sup>5</sup>        | 27                         | 70                                       | 2                             | 30                         | 65                                       | 3                             |
| Fructose <sup>5</sup>       | 33                         | 68                                       | 2                             | 28                         | 60                                       | 3                             |
| Galactose <sup>5</sup>      | 36                         | 80                                       | 0                             | 35                         | 78                                       | 0                             |
| Sucrose <sup>5</sup>        | 29                         | 72                                       | 3                             | 33                         | 64                                       | 3                             |
| Maltose <sup>5</sup>        | 20                         | 68                                       | 4                             | 26                         | 60                                       | 6                             |
| Lactose <sup>5</sup>        | 43                         | 78                                       | 1                             | 41                         | 87                                       | 1                             |
| Starch                      | 35                         | 64                                       | 4                             | 27                         | 67                                       | 3                             |

---

FFQ, food frequency questionnaire for validity; DR, dietary record

<sup>1</sup> Percentage of participants whose sugar intakes from FFQ and DR were classified into the same category by quintile.

<sup>2</sup> Percentage of participants whose sugar intakes from FFQ and DR were classified into the same or adjacent category by quintile.

<sup>3</sup> Percentage of participants whose sugar intakes from FFQ and DR were classified into the extreme (lowest or highest) category by quintile.

<sup>4</sup> "Total sugars" was the sum of the crude consumption of the following saccharides: glucose, fructose, galactose, sucrose, maltose, and lactose.

<sup>5</sup> Sugars intakes were adjusted for using the density method.
